# Supplementary material
Source: ML conference proceedings conference paper supplement (https://openreview.net/forum?id=1TEZ1hiY5m)
Supplement: supplementary_material [file attachment]

## 336 A Gaussian Splatting Details

337 We initialize the 3DGS start points with points deprojected from DROID-SLAM disparity, de-  
338 duplicated. To accomodate small amounts of SLAM drift, we enable camera optimization, similar  
339 to (Seiskari et al., 2024; Zhao et al., 2024), which refines poses during 3DGS training. To deal with  
340 the large scene scale in our captures, we need to modify a few important hyperparameters inside  
341 Splatfacto, which was primarily tuned for use with object-centric captures. We use the AbsGS split-  
342 ting heuristic introduced by (Ye et al., 2024) with a gradient threshold of 0.0006 as well as lowered  
343 learning rate on the Adam optimizer controlling 3DGS means to  $5e - 5$  as recommended by the orig-  
344 inal implementation. We also extend the length of the culling/splitting portion of 3DGS training from  
345 15000 to 25000 steps, and lower the densify size threshold to 0.1% from 1%, ensuring fine details  
346 are reconstructed.

## 347 B Hardware Specifications

348 The PAWS data collection system consists of three cameras, one on each shoulder, and a third camera  
349 pointed at the feet. The shoulder-mounted cameras are stereo ZedX Mini cameras, while the down-  
350 ward facing camera is a stereo Zed Mini. For depth estimation we opt for the provided neural depth  
351 model, which is slightly less accurate than RAFT-Stereo (Lipson et al., 2021) yet considerably faster.  
352 The three cameras are connected to a rigid plate attached to the chest, and their precise transforms  
353 are derived from the CAD model. All three cameras are connected to a NVIDIA Jetson AGX Orin  
354 Developer Kit which hardware encodes and saves the three camera streams for later processing.

## 355 C Rendering Performance Analysis

356 3D Gaussian Splatting models support fast batch rendering, capable of rendering thousands of frames  
357 per second at certain resolutions.

| Resolution         | FPS (RGB + Depth) |
|--------------------|-------------------|
| $64 \times 64$     | $1487 \pm 12$     |
| $96 \times 96$     | $1023 \pm 9$      |
| $256 \times 256$   | $756 \pm 9$       |
| $512 \times 512$   | $431 \pm 6$       |
| $1024 \times 1024$ | $185 \pm 3$       |

Figure C.1: Rendering frames per second for various resolutions. Reported times are for computing both RGB and Depth values from the 3DGS.
