# Supplementary material
Source: ML conference proceedings conference paper supplement (https://openreview.net/forum?id=1TEZ1hiY5m)
Supplement: supplementary_material [file attachment]

## 230 References

- 231 M. Mittal, C. Yu, Q. Yu, J. Liu, N. Rudin, D. Hoeller, J. L. Yuan, R. Singh, Y. Guo, H. Mazhar,  
232 A. Mandlekar, B. Babich, G. State, M. Hutter, and A. Garg. Orbit: A unified simulation framework  
233 for interactive robot learning environments. *IEEE Robotics and Automation Letters*, 8(6):3740–  
234 3747, 2023. doi:10.1109/LRA.2023.3270034.
- 235 B. Mildenhall, P. P. Srinivasan, M. Tancik, J. T. Barron, R. Ramamoorthi, and R. Ng. Nerf:  
236 Representing scenes as neural radiance fields for view synthesis. In *ECCV*, 2020.
- 237 B. Kerbl, G. Kopanas, T. Leimkühler, and G. Drettakis. 3d gaussian splatting for real-time radiance  
238 field rendering. *ACM Transactions on Graphics*, 42(4), July 2023. URL [https://repo-sam.  
239 inria.fr/fungraph/3d-gaussian-splatting/](https://repo-sam.inria.fr/fungraph/3d-gaussian-splatting/).
- 240 Z. Teed and J. Deng. DROID-SLAM: deep visual SLAM for monocular, stereo, and RGB-D cameras.  
241 *CoRR*, abs/2108.10869, 2021. URL <https://arxiv.org/abs/2108.10869>.
- 242 B. Cheng, I. Misra, A. G. Schwing, A. Kirillov, and R. Girdhar. Masked-attention mask transformer  
243 for universal image segmentation. In *Proceedings of the IEEE/CVF Conference on Computer  
244 Vision and Pattern Recognition (CVPR)*, pages 1290–1299, June 2022.
- 245 E. Olson. Apriltag: A robust and flexible visual fiducial system. In *2011 IEEE International  
246 Conference on Robotics and Automation*, pages 3400–3407, 2011. doi:10.1109/ICRA.2011.  
247 5979561.
- 248 V. Ye, M. Turkulainen, and the Nerfstudio team. gsplat. [https://github.com/  
249 nerfstudio-project/gsplat](https://github.com/nerfstudio-project/gsplat), 2023.
- 250 M. Tancik, E. Weber, E. Ng, R. Li, B. Yi, J. Kerr, T. Wang, A. Kristoffersen, J. Austin, K. Salahi,  
251 et al. Nerfstudio: A modular framework for neural radiance field development. *arXiv preprint  
252 arXiv:2302.04264*, 2023.
- 253 M. Caron, H. Touvron, I. Misra, H. Jégou, J. Mairal, P. Bojanowski, and A. Joulin. Emerging  
254 properties in self-supervised vision transformers, 2021.
- 255 R. A. Newcombe, S. J. Lovegrove, and A. J. Davison. Dtam: Dense tracking and mapping in real-  
256 time. In *2011 International Conference on Computer Vision*, pages 2320–2327, 2011. doi:10.  
257 1109/ICCV.2011.6126513.
- 258 J. L. Schönberger and J.-M. Frahm. Structure-from-motion revisited. In *Conference on Computer  
259 Vision and Pattern Recognition (CVPR)*, 2016.
- 260 R. Mur-Artal, J. M. M. Montiel, and J. D. Tardós. ORB-SLAM: a versatile and accurate monocular  
261 SLAM system. *IEEE Transactions on Robotics*, 31(5):1147–1163, 2015. doi:10.1109/TRO.2015.  
262 2463671.
- 263 T. Müller, A. Evans, C. Schied, and A. Keller. Instant neural graphics primitives with a  
264 multiresolution hash encoding. *ACM Trans. Graph.*, 41(4):102:1–102:15, July 2022. doi:  
265 10.1145/3528223.3530127. URL <https://doi.org/10.1145/3528223.3530127>.
- 266 J. T. Barron, B. Mildenhall, M. Tancik, P. Hedman, R. Martin-Brualla, and P. P. Srinivasan. Mip-  
267 nerf: A multiscale representation for anti-aliasing neural radiance fields. In *Proceedings of the  
268 IEEE/CVF International Conference on Computer Vision*, pages 5855–5864, 2021.
- 269 J. T. Barron, B. Mildenhall, D. Verbin, P. P. Srinivasan, and P. Hedman. Mip-nerf 360: Unbounded  
270 anti-aliased neural radiance fields. In *Proceedings of the IEEE/CVF Conference on Computer  
271 Vision and Pattern Recognition*, pages 5470–5479, 2022.
- 272 J. T. Barron, B. Mildenhall, D. Verbin, P. P. Srinivasan, and P. Hedman. Zip-nerf: Anti-aliased grid-  
273 based neural radiance fields. *arXiv preprint arXiv:2304.06706*, 2023.

274 M. Tancik, V. Casser, X. Yan, S. Pradhan, B. Mildenhall, P. P. Srinivasan, J. T. Barron, and  
275 H. Kretzschmar. Block-nerf: Scalable large scene neural view synthesis. In *Proceedings of the*  
276 *IEEE/CVF Conference on Computer Vision and Pattern Recognition*, pages 8248–8258, 2022.

277 M. Tancik, E. Weber, E. Ng, R. Li, B. Yi, J. Kerr, T. Wang, A. Kristoffersen, J. Austin, K. Salahi,  
278 A. Ahuja, D. McAllister, and A. Kanazawa. Nerfstudio: A modular framework for neural radiance  
279 field development. In *ACM SIGGRAPH 2023 Conference Proceedings*, SIGGRAPH ’23, 2023.

280 G. Feng, H. Zhang, Z. Li, X. B. Peng, B. Basireddy, L. Yue, Z. Song, L. Yang, Y. Liu, K. Sreenath,  
281 et al. Genloco: Generalized locomotion controllers for quadrupedal robots. In *Conference on*  
282 *Robot Learning*, pages 1893–1903. PMLR, 2023.

283 J. Lee, J. Hwangbo, L. Wellhausen, V. Koltun, and M. Hutter. Learning quadrupedal locomotion over  
284 challenging terrain. *Science robotics*, 5(47):eabc5986, 2020.

285 A. Kumar, Z. Fu, D. Pathak, and J. Malik. Rma: Rapid motor adaptation for legged robots. *ArXiv*,  
286 abs/2107.04034, 2021. URL <https://api.semanticscholar.org/CorpusID:235650916>.

287 A. Agarwal, A. Kumar, J. Malik, and D. Pathak. Legged locomotion in challenging terrains  
288 using egocentric vision. In K. Liu, D. Kulic, and J. Ichnowski, editors, *Proceedings of The*  
289 *6th Conference on Robot Learning*, volume 205 of *Proceedings of Machine Learning Research*,  
290 pages 403–415. PMLR, 14–18 Dec 2023. URL [https://proceedings.mlr.press/v205/](https://proceedings.mlr.press/v205/agarwal23a.html)  
291 [agarwal23a.html](https://proceedings.mlr.press/v205/agarwal23a.html).

292 A. Loquercio, A. Kumar, and J. Malik. Learning visual locomotion with cross-modal supervision.  
293 In *2023 IEEE International Conference on Robotics and Automation (ICRA)*, pages 7295–7302.  
294 IEEE, 2023.

295 S. Jung, J. Lee, X. Meng, B. Boots, and A. Lambert. V-strong: Visual self-supervised traversability  
296 learning for off-road navigation, 2024.

297 A. Amini, T. Wang, I. Gilitschenski, W. Schwarting, Z. Liu, S. Han, S. Karaman, and D. Rus. VISTA  
298 2.0: An open, data-driven simulator for multimodal sensing and policy learning for autonomous  
299 vehicles. *CoRR*, abs/2111.12083, 2021. URL <https://arxiv.org/abs/2111.12083>.

300 A. Dosovitskiy, G. Ros, F. Codevilla, A. Lopez, and V. Koltun. CARLA: An open urban driving  
301 simulator. In *Proceedings of the 1st Annual Conference on Robot Learning*, pages 1–16, 2017.

302 S. Shah, D. Dey, C. Lovett, and A. Kapoor. Airsim: High-fidelity visual and physical simulation  
303 for autonomous vehicles. In *Field and Service Robotics*, 2017. URL [https://arxiv.org/abs/](https://arxiv.org/abs/1705.05065)  
304 [1705.05065](https://arxiv.org/abs/1705.05065).

305 W. Guerra, E. Tal, V. Murali, G. Ryou, and S. Karaman. Flightgoggles: Photorealistic sensor  
306 simulation for perception-driven robotics using photogrammetry and virtual reality, 2019.

307 C. Gan, J. Schwartz, S. Alter, M. Schrimpf, J. Traer, J. D. Freitas, J. Kubilius, A. Bhandwaldar,  
308 N. Haber, M. Sano, K. Kim, E. Wang, D. Mrowca, M. Lingelbach, A. Curtis, K. T. Feigelis,  
309 D. M. Bear, D. Gutfreund, D. D. Cox, J. J. DiCarlo, J. H. McDermott, J. B. Tenenbaum, and  
310 D. L. K. Yamins. Threedworld: A platform for interactive multi-modal physical simulation. *CoRR*,  
311 abs/2007.04954, 2020. URL <https://arxiv.org/abs/2007.04954>.

312 K. Bousmalis, A. Irpan, P. Wohlhart, Y. Bai, M. Kelcey, M. Kalakrishnan, L. Downs, J. Ibarz,  
313 P. Pastor, K. Konolige, S. Levine, and V. Vanhoucke. Using simulation and domain adaptation to  
314 improve efficiency of deep robotic grasping. In *2018 IEEE International Conference on Robotics*  
315 *and Automation (ICRA)*, page 4243–4250. IEEE Press, 2018. doi:10.1109/ICRA.2018.8460875.  
316 URL <https://doi.org/10.1109/ICRA.2018.8460875>.

- 317 A. Shrivastava, T. Pfister, O. Tuzel, J. Susskind, W. Wang, and R. Webb. Learning from simulated and  
318 unsupervised images through adversarial training. In *2017 IEEE Conference on Computer Vision  
319 and Pattern Recognition (CVPR)*, pages 2242–2251, Los Alamitos, CA, USA, jul 2017. IEEE  
320 Computer Society. doi:10.1109/CVPR.2017.241. URL [https://doi.ieeecomputersociety.  
321 org/10.1109/CVPR.2017.241](https://doi.ieeecomputersociety.org/10.1109/CVPR.2017.241).
- 322 D. Tirumala, M. Wulfmeier, B. Moran, S. Huang, J. Humplik, G. Lever, T. Haarnoja, L. Hasenclever,  
323 A. Byravan, N. Batchelor, N. Sreendra, K. Patel, M. Gwira, F. Nori, M. Riedmiller, and N. Heess.  
324 Learning robot soccer from egocentric vision with deep reinforcement learning, 2024.
- 325 D. Tomè, T. Alldieck, P. Peluse, G. Pons-Moll, L. Agapito, H. Badino, and F. D. la Torre. Selfpose:  
326 3d egocentric pose estimation from a headset mounted camera. *CoRR*, abs/2011.01519, 2020.  
327 URL <https://arxiv.org/abs/2011.01519>.
- 328 O. Seiskari, J. Ylilammi, V. Kaatrasalo, P. Rantalankila, M. Turkulainen, J. Kannala, and A. Solin.  
329 Gaussian splatting on the move: Blur and rolling shutter compensation for natural camera motion,  
330 2024.
- 331 L. Zhao, P. Wang, and P. Liu. BAD-Gaussians: Bundle Adjusted Deblur Gaussian Splatting. 2024.
- 332 Z. Ye, W. Li, S. Liu, P. Qiao, and Y. Dou. Absgs: Recovering fine details for 3d gaussian splatting,  
333 2024.
- 334 L. Lipson, Z. Teed, and J. Deng. Raft-stereo: Multilevel recurrent field transforms for stereo  
335 matching. *CoRR*, abs/2109.07547, 2021. URL <https://arxiv.org/abs/2109.07547>.
